# Supplementary material for: Molecular engineering to boost the photothermal effect of conjugated oligomer nanoparticles
Source: Royal Society of Chemistry journal article supplement (doi:10.1039/d0bm02094j), 2021-01-01
Supplement: d0bm02094j1.pdf [file d0bm02094j1.pdf]

## Supporting Information

### **Molecular engineering to boost photothermal effect of conjugated oligomer nanoparticles**

*Hui Zhang<sup>a</sup>, Lixia Guo<sup>b</sup>, Yunxia Wang,<sup>a\*</sup> Liheng Feng<sup>a\*</sup>*

<sup>a</sup>School of Chemistry and Chemical Engineering, Shanxi University, Taiyuan, 030006,  
P.R. China

<sup>b</sup>School of Basic Medical Sciences, Shanxi Medical University, Taiyuan 030001, P. R.  
China

E-mail: wangyunxia@sxu.edu.cn (Y.X.W.), lhfeng@sxu.edu.cn (L.H.F.)

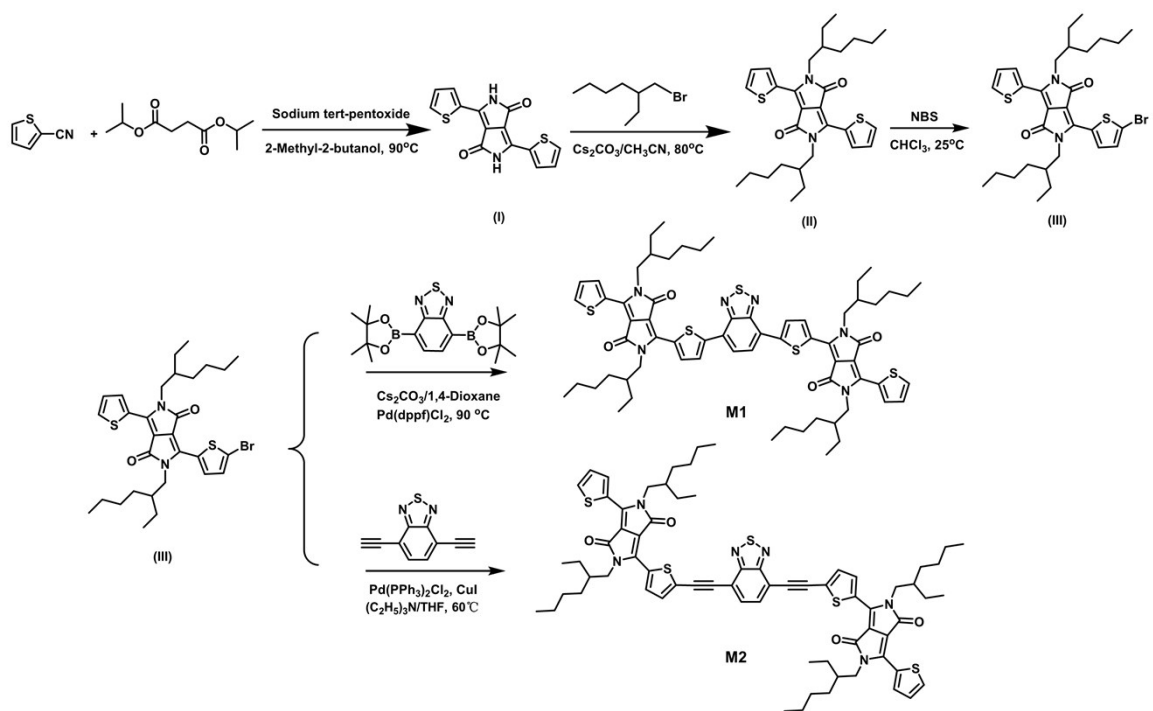

**Fig. S1.** Synthetic route of oligomers M1 and M2.

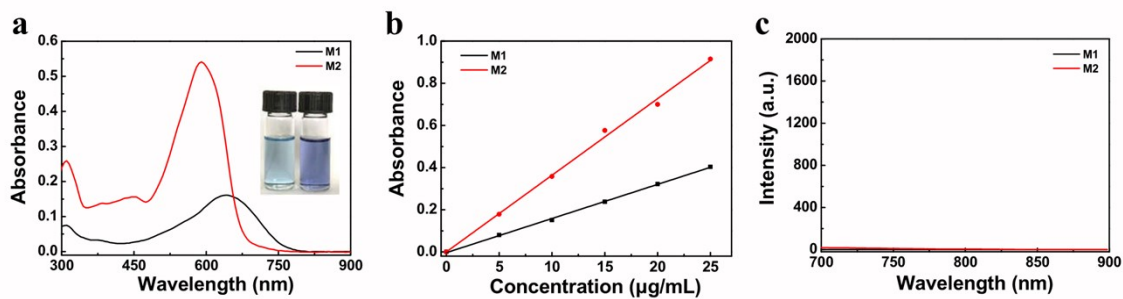

**Fig. S2.** (a) Absorption spectra of M1 and M2 (10 µg/mL) in THF. The inset shows the photograph of M1 and M2 in THF (10 µg/mL). (b) Absorbance of different concentrations of M1 and M2 at 642 nm in THF. (c) Fluorescence emission spectra of M1 and M2 in THF (10 µg/mL).

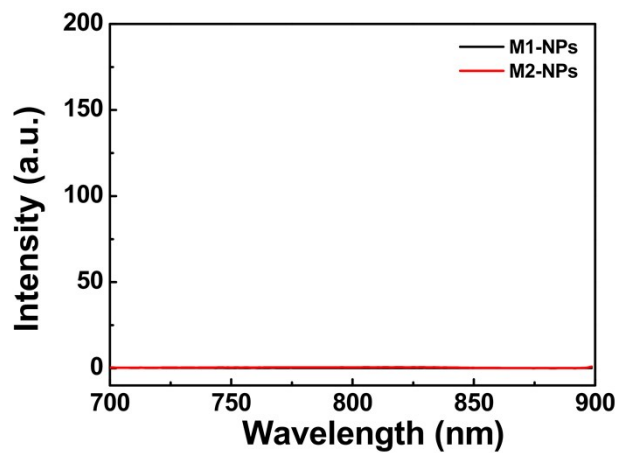

**Fig. S3.** Fluorescence emission spectra of M1-NPs and M2-NPs in water (10 µg/mL).

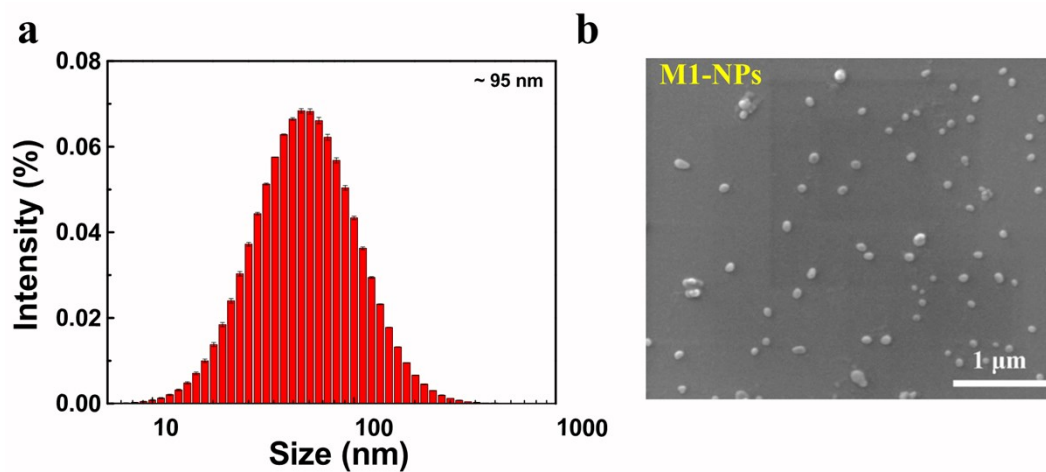

*Fig. S4.* (a) DLS of M1-NPs in water. (b) SEM image of M1-NPs.

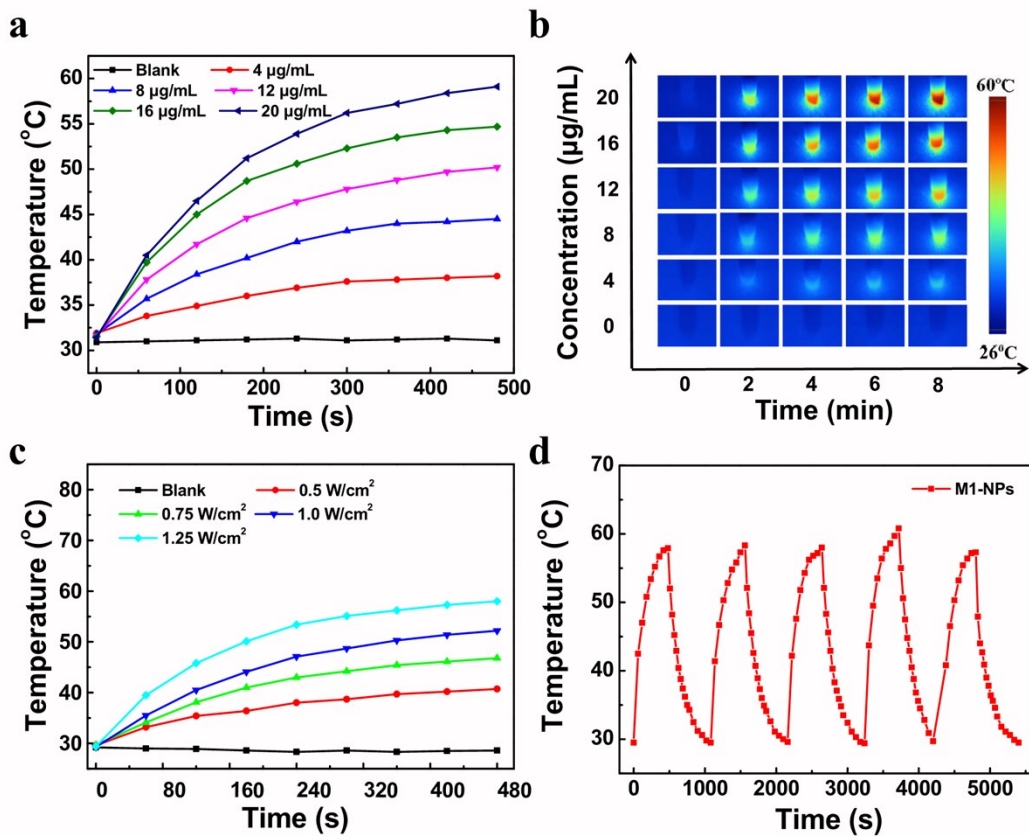

**Fig. S5.** (a) Temperature curves and (b) thermal images of the M1-NPs aqueous solution with various concentrations under laser irradiation (660 nm, 0.75 W/cm<sup>2</sup>). (c) Temperature curves of the M1-NPs (10 µg/mL) was illuminated by a 660 nm laser at different power densities. (d) Temperature profiles of M1-NPs (20 µg/mL) for five cycles of ON/OFF laser irradiation (660 nm laser, 0.75 W/cm<sup>2</sup>).

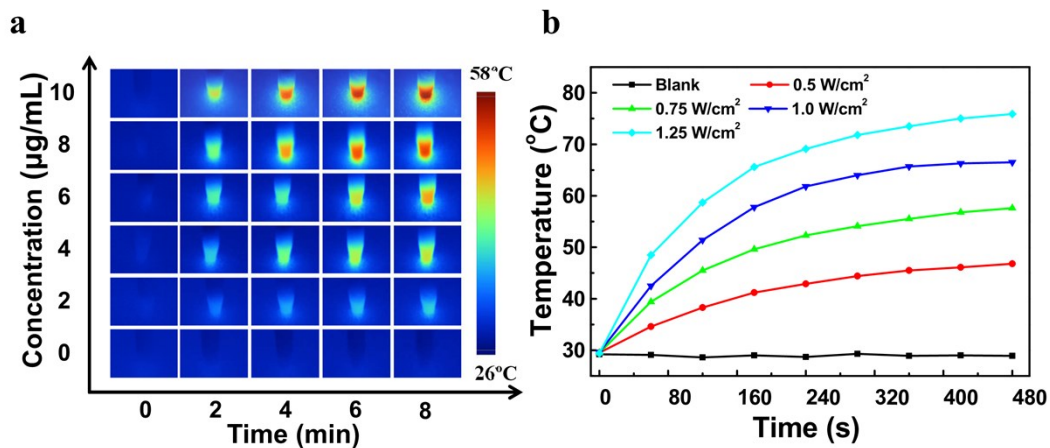

**Fig. S6.** (a) Thermal images of the M2-NPs with various concentrations under laser irradiation (660 nm laser, 0.75 W/cm<sup>2</sup>). (b) Temperature elevation of the M2-NPs (10 µg/mL) illuminated by a 660 nm laser at different power densities.

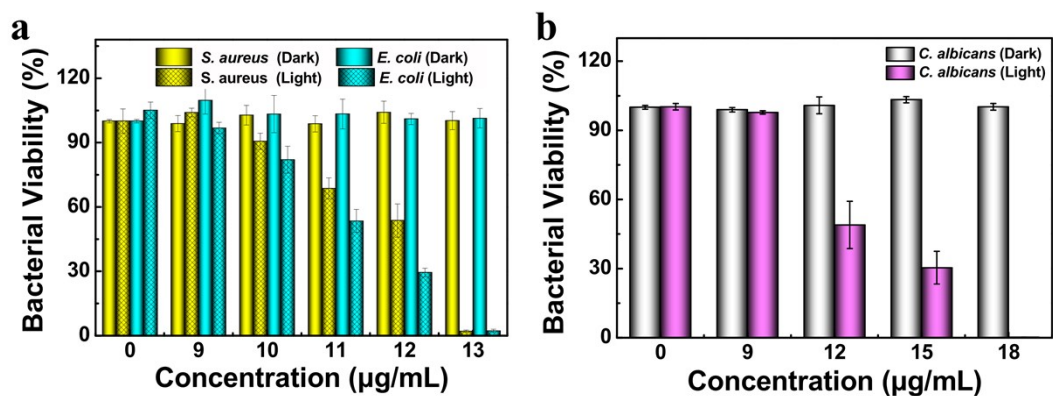

**Fig. S7.** (a) Antibacterial activity of M1-NPs at different conditions toward Amp<sup>r</sup> *E. coli*, *S. aureus* and (b) *C. albicans* in the dark and under 660 nm laser irradiation (0.75 W/cm<sup>2</sup>, 8 min). Data were presented as mean ± SD (n = 3).

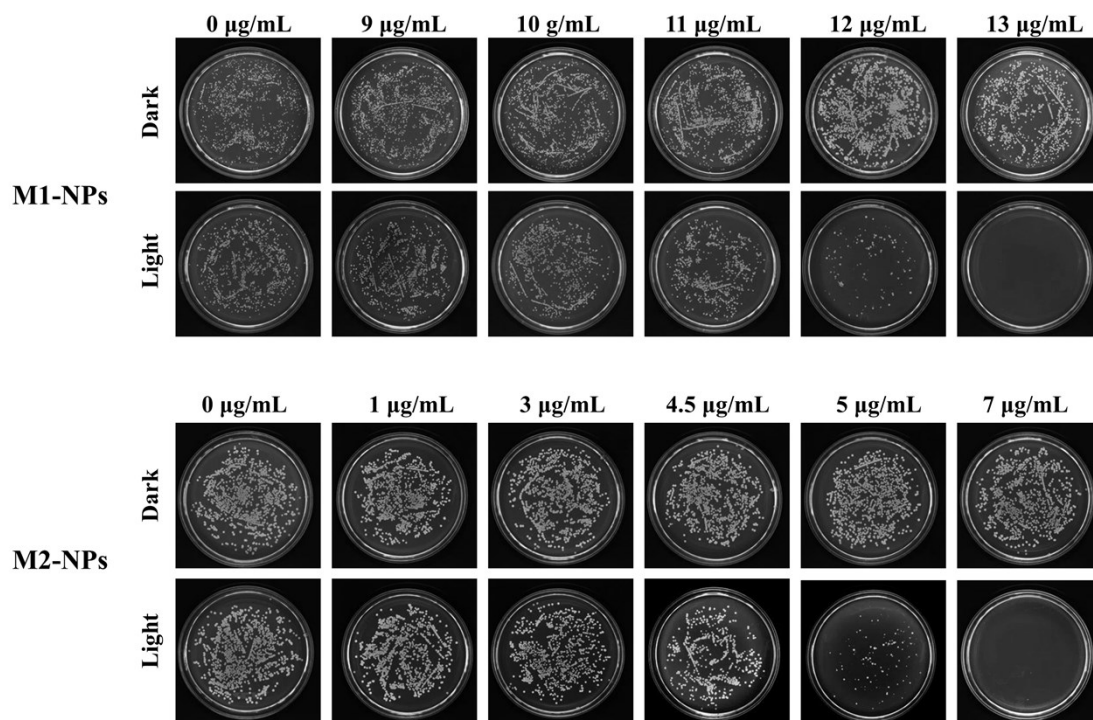

**Fig. S8.** Photographs of *S. aureus* colonies on the plates after treatment of M1-NPs and M2-NPs at different concentrations with and without light irradiation (660 nm laser, 0.75 W/cm<sup>2</sup>, 8 min).

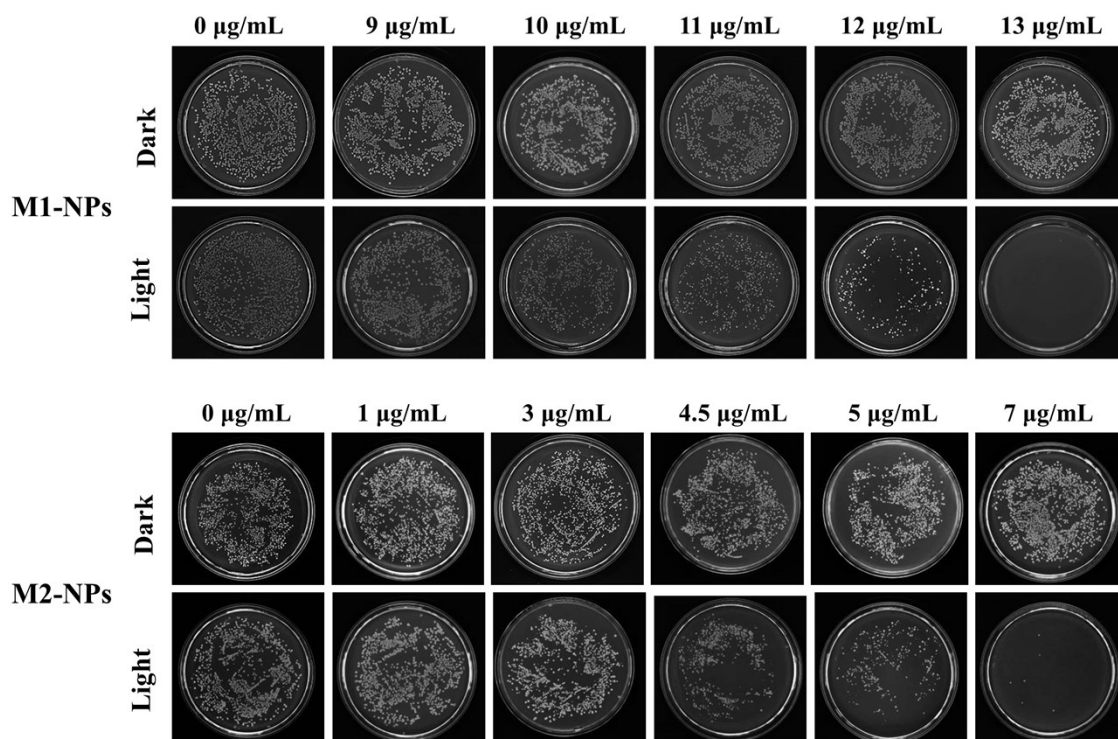

**Fig. S9.** Photographs of Amp<sup>r</sup> *E. coli* colonies on the plates after treatment of M1-NPs and M2-NPs at different concentrations with and without light irradiation (660 nm laser, 0.75 W/cm<sup>2</sup>, 8 min).



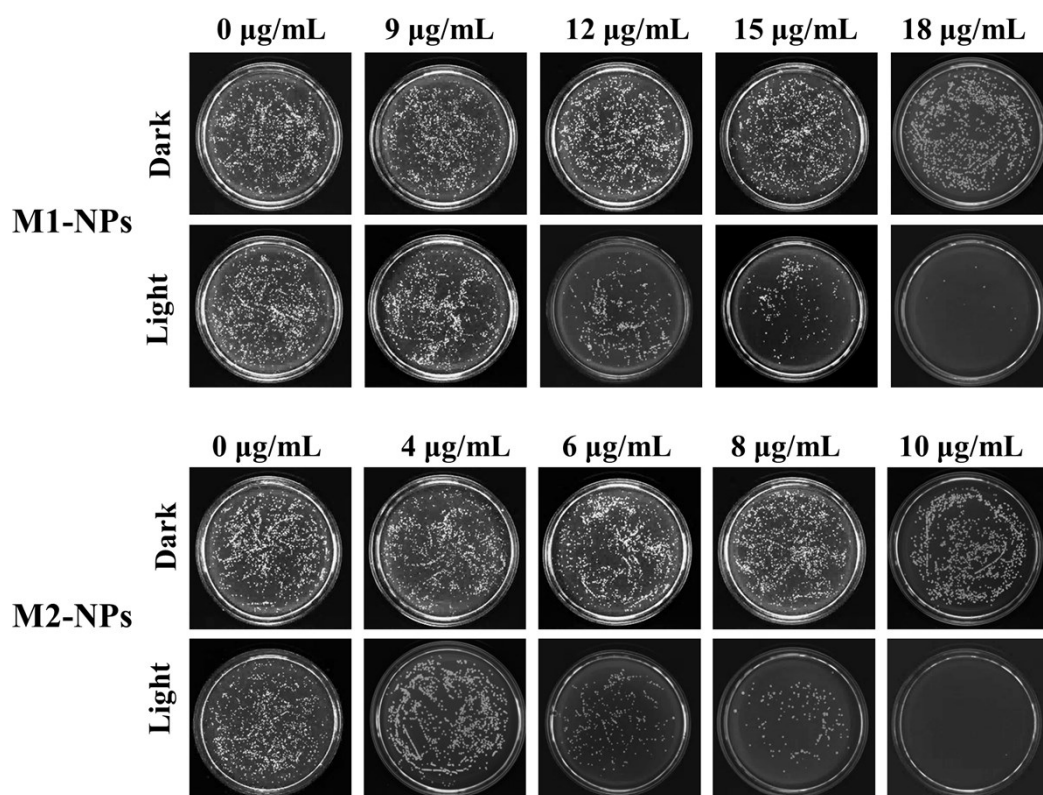

**Fig. S10.** Photographs of *C. albicans* colonies on the plates after treatment of M1-NPs and M2-NPs at different concentrations with and without light irradiation (660 nm laser, 0.75 W/cm<sup>2</sup>, 8 min).

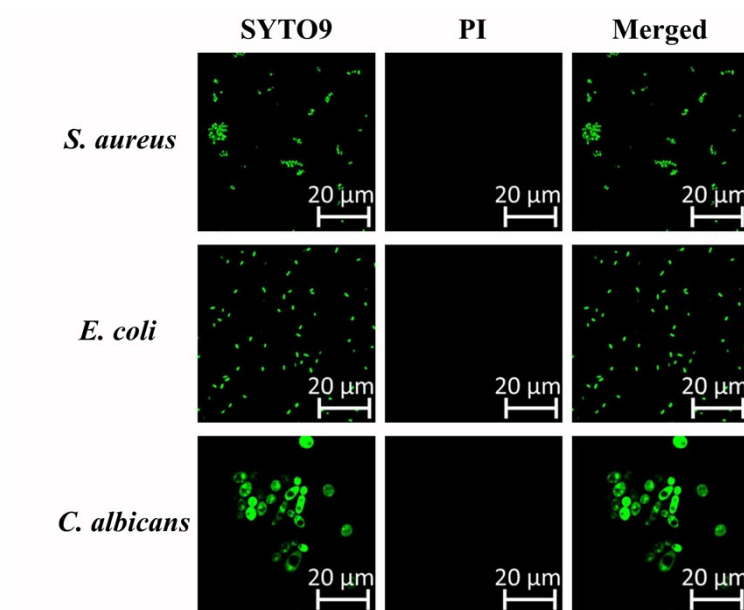

**Fig. S11.** CLSM images of Amp<sup>r</sup> *E. coli*, *S. aureus* and *C. albicans* with treatment of M2-NPs in the dark stained by SYTO9 and PI ([M2-NPs] = 7 μg/mL for Amp<sup>r</sup> *E. coli* and *S. aureus*, [M2-NPs] = 10 μg/mL for *C. albicans*).

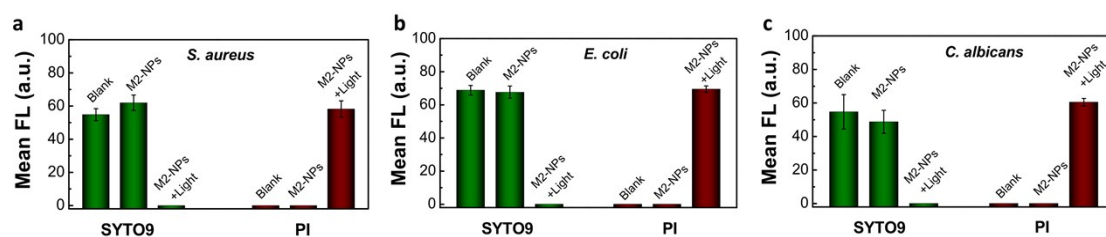

**Fig. S12.** Mean fluorescence intensities of (a) Amp<sup>r</sup> *E. coli*, (b) *S. aureus* and (c) *C. albicans* with and without treatment of M2-NPs in the dark and under 660 nm laser irradiation (0.75 W/cm<sup>2</sup>, 8 min). [M2-NPs] = 7 μg/mL for Amp<sup>r</sup> *E. coli* and *S. aureus*, [M2-NPs] = 10 μg/mL for *C. albicans*.

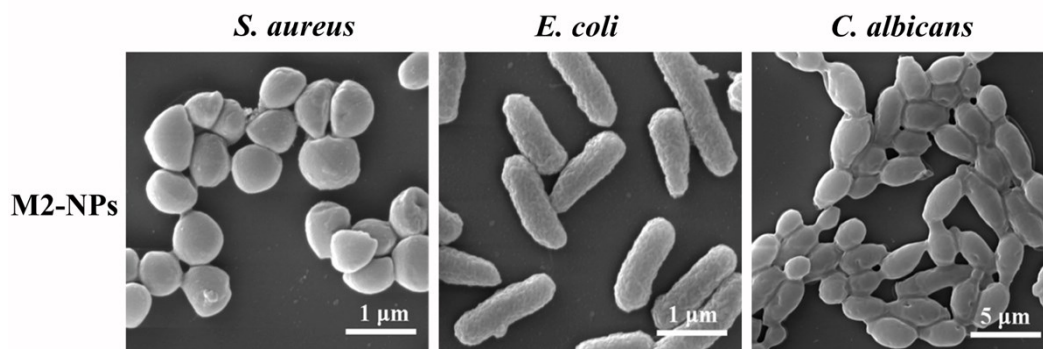

**Fig. S13.** Representative SEM images of Amp<sup>r</sup> *E. coli*, *S. aureus* and *C. albicans* with treatment of M2-NPs in the dark ([M2-NPs] = 7  $\mu\text{g}/\text{mL}$  for Amp<sup>r</sup> *E. coli*, *S. aureus*, [M2-NPs] = 10  $\mu\text{g}/\text{mL}$  for *C. albicans*).

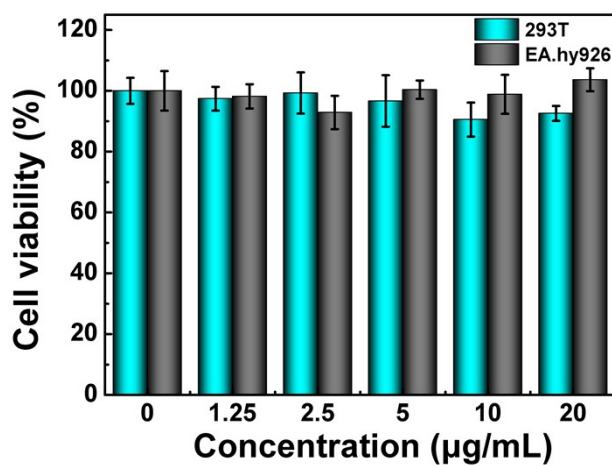

**Fig. S14.** Cytotoxicity of M1-NPs on mammalian cells 293T and EA.hy926. Data were presented as mean  $\pm$  SD (n = 3).

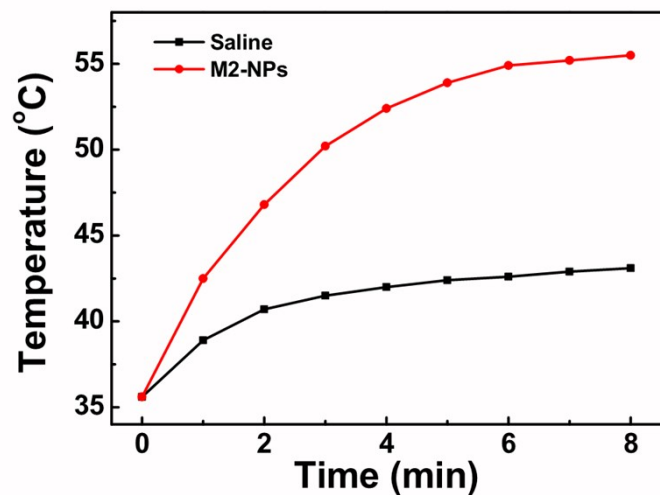

**Fig. S15.** Photothermal curves of *S. aureus*-infected sites in mice after different treatments: saline + light and M2-NPs + light. The power density of light was 0.75 W/cm<sup>2</sup> from a 660 nm laser.

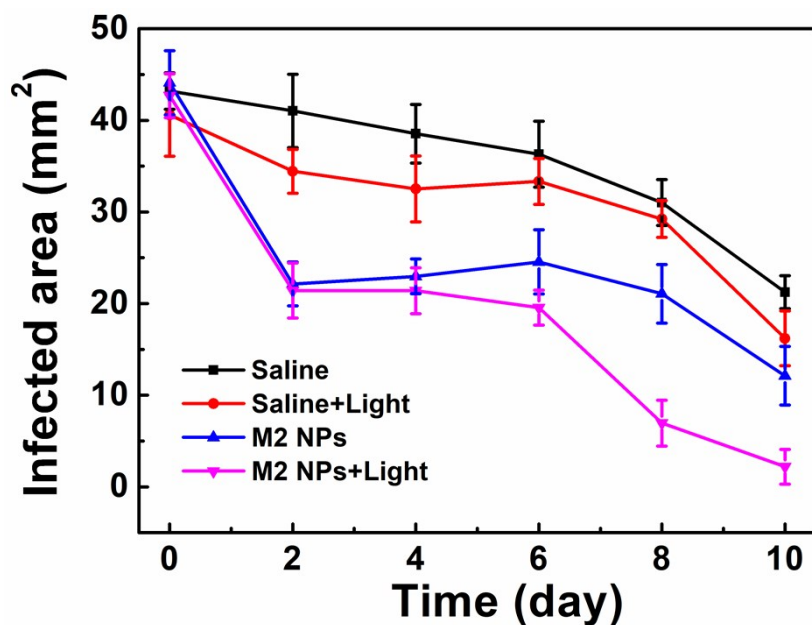

**Fig. S16.** Changes of wound area after treatment with saline, saline + light, M2-NPs, and M2-NPs + light. The power density of light is 0.75 W/cm<sup>2</sup>, and the irradiation time is 8 min.

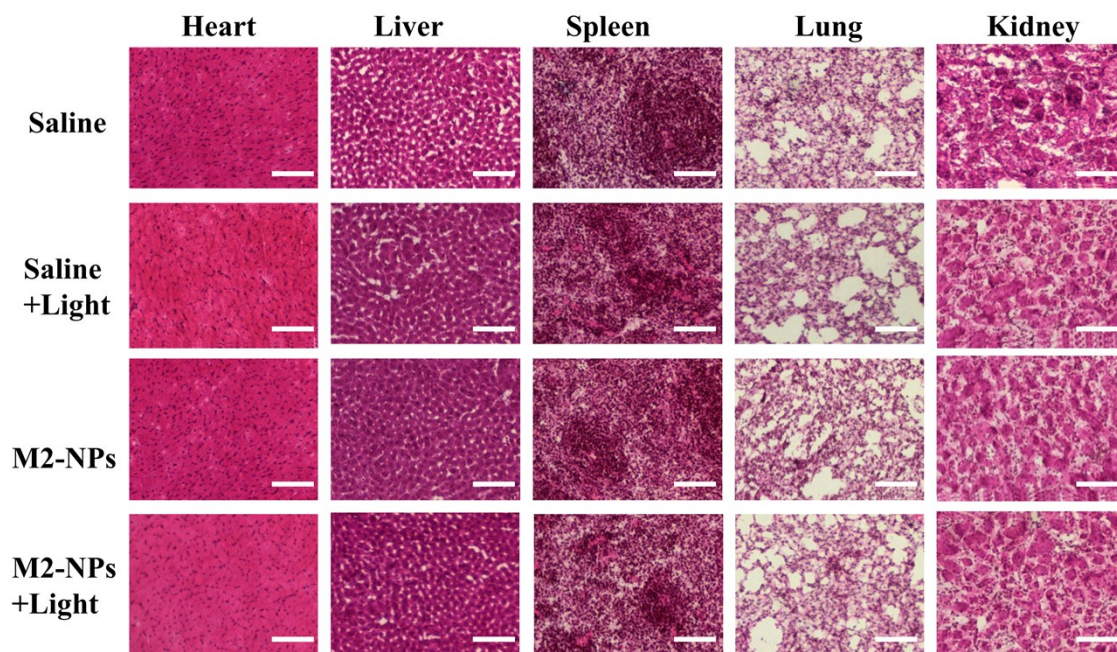

**Fig. S17.** Images of H&E-stained tissue slices from major organs (heart, liver, spleen, lung, and kidney) of different treatment groups. Scale bar: 100  $\mu$ m.
